# Supplementary material
Source: publisher figshare collection journal article supplement (https://tandf.figshare.com/ndownloader/files/20284983)
Supplement: Supplementary file 1 [file 20284983]

## First case of a dog infected with *Aspergillus (Phialosimplex) caninus* in Australasia

W Yang<sup>\*§</sup>, BR Jones<sup>\*</sup>, G Rossi<sup>\*</sup>, N Stephens<sup>\*</sup>, I Arthur<sup>†</sup>, A Merritt<sup>†</sup>, S Reese<sup>‡</sup> and KFA Langner<sup>\*</sup>

\*The Animal Hospital at Murdoch University, Murdoch, WA, Australia

†PathWest Department of Microbiology and Infectious Disease, Queen Elizabeth II Medical Centre, Nedlands, WA, Australia

‡Vet Imaging Specialists, Murdoch, WA, Australia

§Author for correspondence. Email: wenjieyang07@gmail.com

**Supplementary Table 1. Clinical and pathological findings for all reported cases of dogs infected with *Aspergillus (Phialosimplex) caninus*.**

| Case <sup>a</sup> | History and physical exam                                                                                                                                                                            | Tissue(s) identified with fungal elements | Haematology                                                                   | Biochemistry                                                       | Urinalysis                                      | Imaging findings                                                                                                                                                                    | Treatment                                                                                                                   |
|-------------------|------------------------------------------------------------------------------------------------------------------------------------------------------------------------------------------------------|-------------------------------------------|-------------------------------------------------------------------------------|--------------------------------------------------------------------|-------------------------------------------------|-------------------------------------------------------------------------------------------------------------------------------------------------------------------------------------|-----------------------------------------------------------------------------------------------------------------------------|
| 1                 | Non-regenerative IMHA treated for 3.5 months with prednisone, hepatosplenomegaly, enlarged superficial cervical and popliteal LN                                                                     | Bone marrow                               | Normocytic, normochromic regenerative anaemia, neutrophilia with a left shift | ↑ALP                                                               | Normal, culture negative for bacteria and fungi | Hepatomegaly, intra-abdominal lymphadenopathy, heterogenous left pancreatic limb                                                                                                    | Itraconazole, changed to amphotericin B and changed back to itraconazole; prednisone for immune-mediated haemolytic anaemia |
| 2                 | Acute vomiting, abdominal pain, decreased appetite, depression, mid-caudal abdominal mass, moderately enlarged left prescapular LN, decreased mentation, mild dehydration, bradycardia, hypertension | Mesenteric mass, spleen, prescapular LN   | Mature neutrophilia, monocytosis                                              | ↑TP, ↑globulin, ↑urea, ↓chloride                                   | N/A                                             | Cranial mediastinal mass, abdominal masses, splenomegaly with multifocal hypoechoic nodules                                                                                         | Itraconazole, single dexamethasone dose, tapering prednisone for 9 days, tramadol, maropitant, famotidine                   |
| 3                 | Increased liver enzymes, PU/PD, decreased appetite, dull, mild muscle wasting, petechial haemorrhage on the medial aspect of the left fundus                                                         | Spleen and liver                          | Mild left shift, thrombocytopenia                                             | ↑ALT, ↑ALP, ↑bilirubin, ↓albumin, ↑globulin, ↑CK, ↑ionised calcium | USG 1.024, 2+ bilirubin, 2+ protein             | Diffusely mottled spleen, coarse hepatic parenchyma, intra-abdominal lymphadenomegaly; multifocal vertebral and sternal endplate lysis identified 12 months after initial diagnosis | Itraconazole, changed to posaconazole                                                                                       |

The content of this supplementary information has not been edited. All risk and liability rest with the authors.

## Supplementary Information

Yang *et al.*

New Zealand Veterinary Journal

S2

| Case <sup>a</sup> | History and physical exam                                                                                                                    | Tissue(s) identified with fungal elements | Haematology                                              | Biochemistry                                              | Urinalysis                               | Imaging findings                                                                                                                                                                                   | Treatment                                                                                      |
|-------------------|----------------------------------------------------------------------------------------------------------------------------------------------|-------------------------------------------|----------------------------------------------------------|-----------------------------------------------------------|------------------------------------------|----------------------------------------------------------------------------------------------------------------------------------------------------------------------------------------------------|------------------------------------------------------------------------------------------------|
| 4                 | Lethargy, anorexia, weight loss, pyrexia                                                                                                     | Cranial mediastinal mass                  | Mild anaemia, neutrophilia, monocytosis                  | ↑TP, ↓albumin, ↑globulin                                  | USG 1.016, inactive sediment             | Cranial mediastinal mass; cervical endplate lysis identified 7 months after initial diagnosis                                                                                                      | Thoracotomy, itraconazole, carprofen, tramadol                                                 |
| 5                 | Right forelimb lameness, lethargy, pyrexia, firm superficial LN, hepatosplenomegaly, diffuse pain                                            | Spleen                                    | Mild anaemia, monocytosis                                | ↓albumin, ↑globulin (polyclonal gammopathy)               | N/A                                      | Tracheobronchial lymphadenomegaly, lytic lesion in right humerus, hepatomegaly, mesenteric lymphadenomegaly, mottled splenomegaly with multiple hypoechoic nodules                                 | Itraconazole, terbinafine                                                                      |
| 6                 | Weight loss, hyporexia, lethargy, generalised peripheral lymphadenopathy, intra-abdominal masses                                             | Liver, popliteal and prescapular LN       | Eosinophilia                                             | ↑TP, ↑creatinine, ↑urea, ↑ionised calcium                 | USG 1.014, inactive sediment             | Sternal and hilar lymphadenopathy, intra-abdominal lymphadenomegaly, splenomegaly with coarse and lacy echogenicity, small areas of mineralization in kidney cortices, diffusely hyperechoic liver | Itraconazole, terbinafine, intravenous fluids, prednisone, amphotericin B                      |
| 7                 | Vitality loss, depression                                                                                                                    | Iliac LN                                  | Normal                                                   | ↑creatinine                                               | Normal                                   | Iliac and splenic lymphadenopathy                                                                                                                                                                  | Fluconazole, changed to itraconazole, changed to voriconazole and changed back to itraconazole |
| 8                 | Productive cough, weight loss, possible pain, enlarged superficial cervical LN, pendulous abdomen with organomegaly, moderate muscle wasting | Prescapular LN                            | Macrocytic, normochromic, minimally regenerative anaemia | ↑ALT, ↑AST, ↑ALP, ↑GGT, ↓albumin, ↑globulin, ↑cholesterol | USG 1.040, 2+ protein, inactive sediment | Diffuse bronchial pattern, thoracic and abdominal lymphadenomegaly, hepatomegaly, splenomegaly                                                                                                     | Itraconazole, s-adenosylmethionine, amoxicillin-clavulanic acid, carprofen                     |

<sup>a</sup> As reported in: case 1, Armstrong *et al.* (2012); case 2, Sigler *et al.* (2013); case 3, Allen *et al.* (2018); cases 4–6, Townsell *et al.* (2018); case 7, Kano *et al.* (2019).

ALP=alkaline phosphatase; ALT=alanine aminotransferase; AST=; CK=creatinine kinase; GGT=gamma glutamyltransferase; IMHA=immune-mediated haemolytic anaemia; LN=lymph node; N/A= not assessed; PU/PD=polyuria/polydipsia; TP=total protein; USG = urine specific gravity
